# Supplementary material
Source: publisher site journal article supplement (https://www.dovepress.com/article/267019)
Supplement: Supplementary file 1 [file get_supplementary_file.php]

**Hypnosis for the management of anxiety and dyspnea in COPD: a randomized, sham-controlled crossover trial – Supplementary Materials**

Anlló H*.* et al, 2020.

[hernan.anllo@cri-paris.org](mailto:hernan.anllo@cri-paris.org)

**Table S1. Inclusion and exclusion criteria**

| **Inclusion Criteria** |
| --- |
| - Aged between 35 and 80. - Affiliated to a Social Security scheme or beneficiary of such a scheme. - Absence of neurological disease interfering with the passing of tests. - No anti-epileptic treatment. - Capable of giving free, informed consent. - Adult patients with severe COPD, dyspnea ; with distension. - Hospitalized, tracheotomized or not. - Non-obese. - Predicted FEV1 < 60 % and FEV/FVC < 70 % - Severity marked by ongoing hospitalization, with at least one prior instance of decompensation. - Dyspneic. - Not having yet participated in the complementary care protocol offered by the hospital, a Pulmonary Rehabilitation Program, or any hypnosis protocol. |
| **Exclusion Criteria** |
| - Pregnancy - Mechanical ventilation during the session. - Known severe cardiac insufficiency. - Known severe pulmonary arterial hypertension. - Evolutive-cancer diagnosis. - Significant cognitive impairment, hypercapnic encephalopaty or confusional syndrome. - Deafness. - Anemia ≤ 8g/dL. - Psychotic pathology. |

FEV1 = forced expiratory volume in 1s; FVC = forced vital capacity; FEV1/ FVC = Tiffeneau score.

*Power analysis and sample size*

We first projected a standard recruitment target of n = 20 (1). Data was collected for 21 participants, of which 2 failed to complete the study, leaving a total of n = 19. To evaluate if sample size and power were sufficient, we conducted a simulation-based power analysis for the primary end-point (ΔSTAI-6). The analysis consisted of simulating data for 1000 random cohorts of patients with the same summary characteristics as the collected sample (n = 19, mean ΔSTAI-6 for sham = -3.1%, SD = 32.8%, mean ΔSTAI-6 for hypnosis = -23.8%, SD = 18.4%), and then repeat the simulation 1000 times for obtaining the Confidence Interval. The simulation showed that for a sample of n = 19, a regression analysis with a significance level of 5% had a power of 79% (95% CI = 76, 81) for detecting a -20.7% difference between post-hypnosis and post-sham mean ΔSTAI-6 scores.

*Carryover & period effects*

We checked for carryover and period effects by modeling the primary end-point (ΔSTAI-6) for each session using Period (levels: “Administered First”, “Administered Second”) and Intervention Type (levels: “Hypnosis”, “Sham”) as predictors (model: ΔSTAI-6 ~ Period X   Intervention Type + Ɛ). Results showed that when considering administration order on its own, Period had no significant impact on outcome (Period main effect P = 0.42, BF = 0.23). When considering intervention type, Hypnosis and Sham produced different outcomes (Intervention Type main effect P < 0.01, BF = 7.56), but this difference was unrelated to Period and by extension to session order (Period X Intervention Type interaction P = 0.13, BF = 1.4). See Table S2 on the on-line supplement for a full statistical summary. For a summary on standard methods for controlling carryover and period effects, see Mills et al., 2009.1

**REFERENCES**

1. Mills E., Chan A-W., Wu P., Vail A. , Guyatt G. H., Altman D. G., (2009) Design, analysis, and presentation of crossover trials. Trials 2009, 10:27, doi:10.1186/1745-6215-10-27.

**Table S2**. **Full models for** Δ**STAI-6 test for carryover and period effects.**

**A.**

| Δ**STAI-6 ~ Period X Intervention Type + Ɛ** | **χ2** | **Degrees of Freedom** | **P value** | **Bayes Factor**  **(from BIC)** |
| --- | --- | --- | --- | --- |
| **Period**  **(First / Second)** | 2.27 | 1 | 0.42  (n.s.) | 0.23 |
| **Intervention Type**  **(Hypnosis / Sham)** | 7.94 | 1 | <0.01 | 7.56 |
| **Period X Intervention Type** | 0.67 | 1 | 0.13  (n.s.) | 1.4 |

**B.**

| Δ**STAI-6 ~ Intervention Type**  **[First period only]** | **Estimated difference** | **F-statistic** | **Degrees of Freedom** | **P value** |
| --- | --- | --- | --- | --- |
| **Intervention Type**  **(Hypnosis / Sham)** | -36.1 (SD= 13.72) | 6.93  (1,17) | 1 | <0.01 |

**A.** Results showed that outcomes for both sessions were independent from period and administration order. Therefore, we concluded that it was possible to pool both periods together. **B.** Separate confirmatory analysis limited to the first period, in which we regressed ΔSTAI-6 against Intervention Type, and found a significant difference between hypnosis and sham sessions (F1,17 = 6.9, P < 0.01). ΔSTAI-6 = difference (% of change) between baseline and outcome for the STAI-6 scores; Intervention Order = predictor with factor levels: Administered First, Administered Second; Sequence = predictor with factor levels Hypnosis-Sham, Sham-Hypnosis; n.s. = not significant; Ɛ = random effects (participant); BIC = Bayesian Information Criterion.


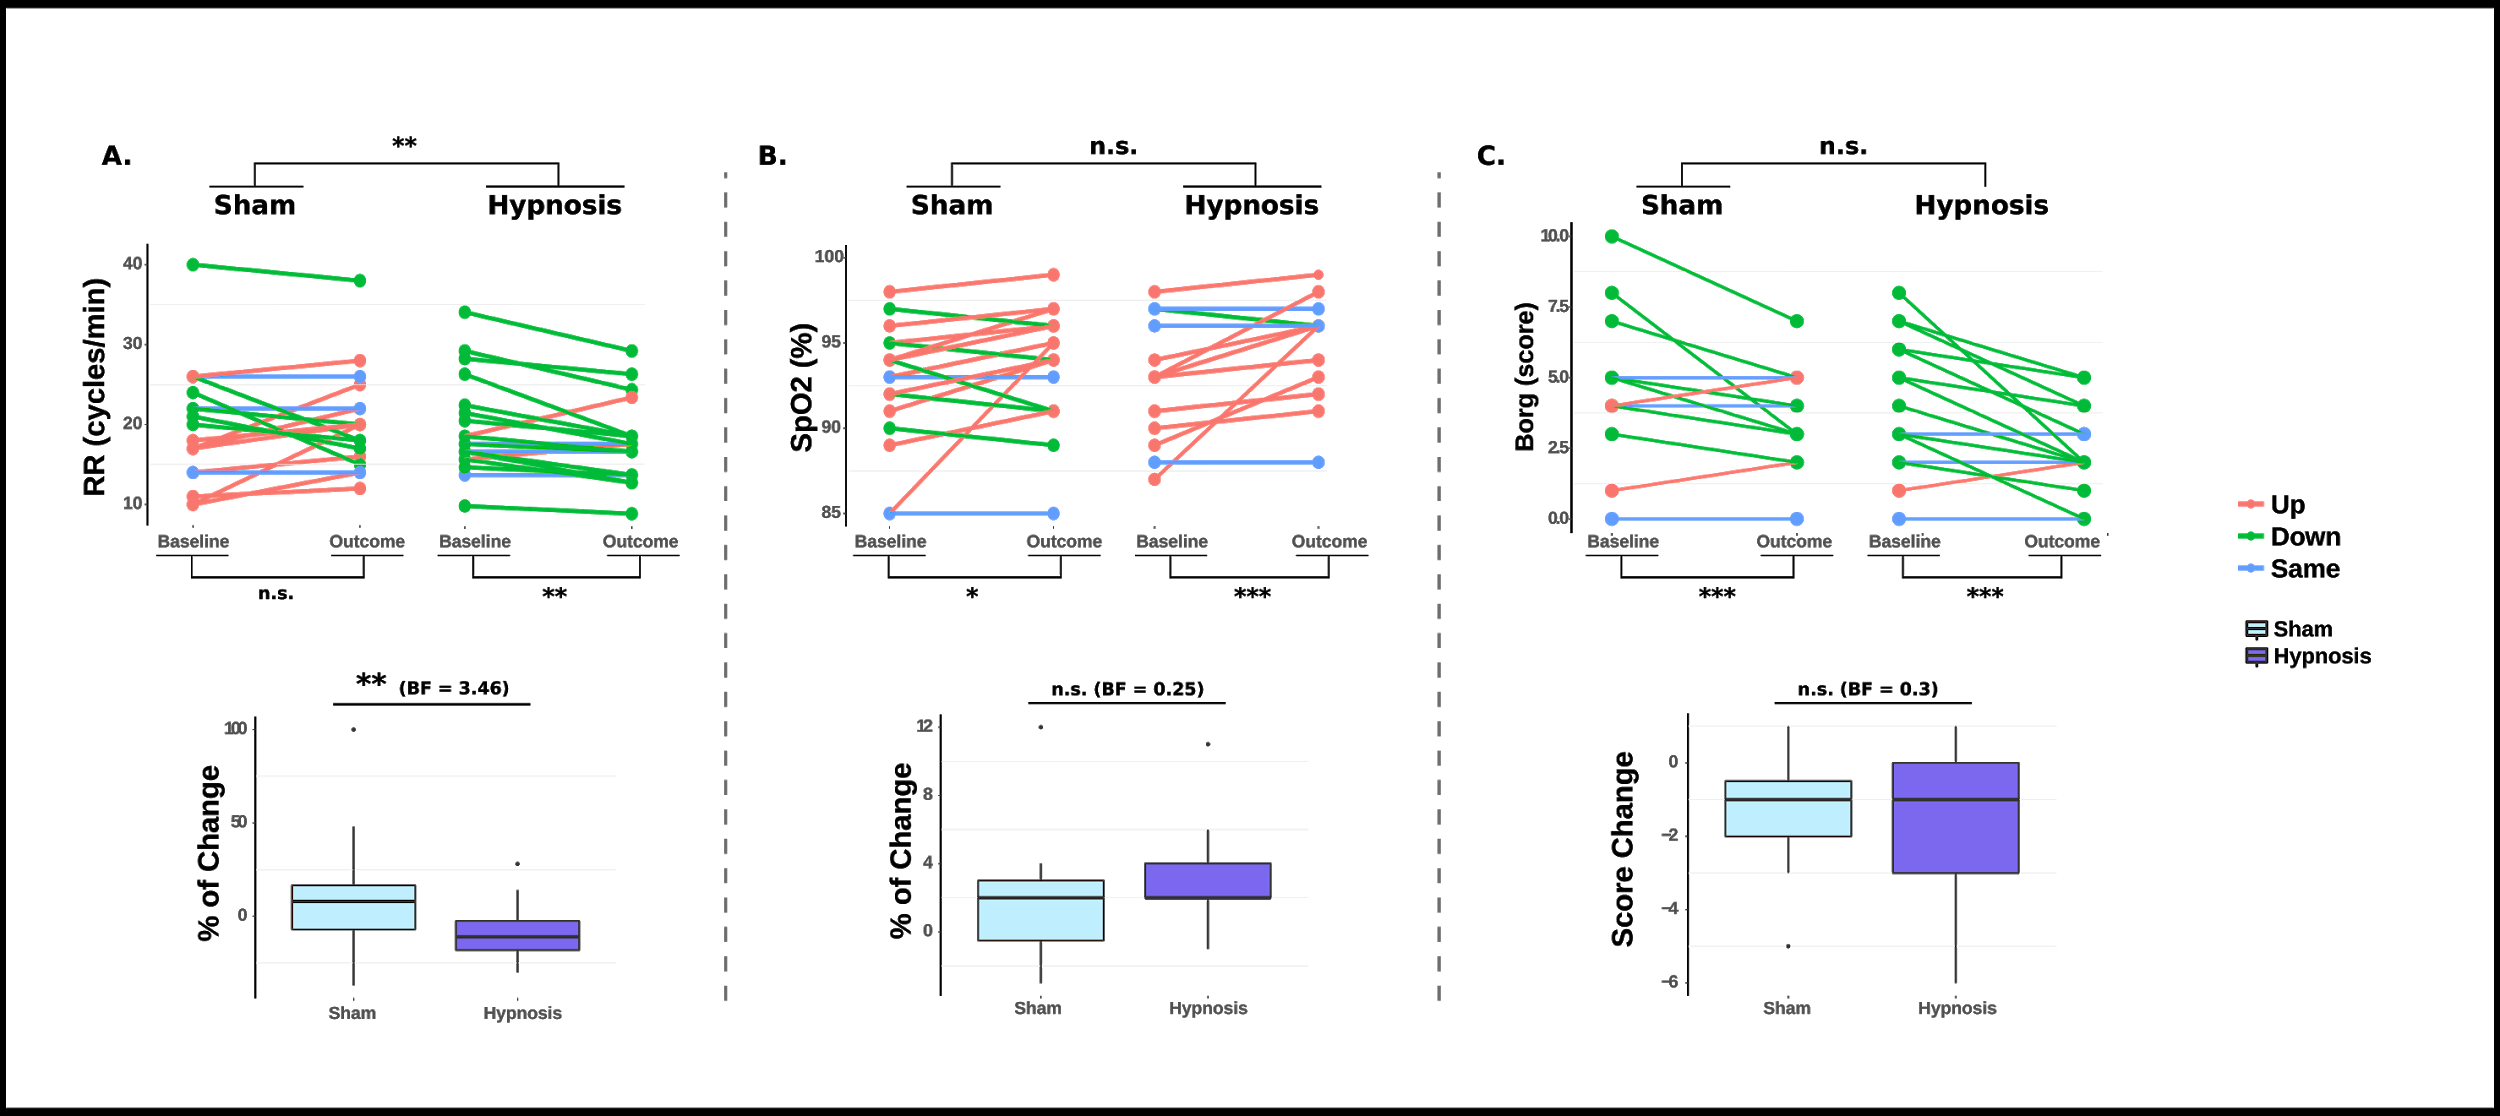


**Figure S1. A.** Changes in Respiratory Rate.Upper:Scores (cycles/min) before and after Sham and Hypnosis. Differences between baseline and outcome were not significant for the sham condition (P=0.56, BF=0.19), but were so for the hypnosis condition (P<0.01, BF=8.32). Lower:ΔRR across conditions. Outcome of the hypnosis session (mean % of change=-9%, SD=13.6) was significantly different from sham (P<0.01, BF=3.46). **B.** Changes in oxygen saturation.Upper: SpO2 (%) before and after Sham and Hypnosis. Differences between baseline and outcome were significant for sham (P<0.05, BF=1.27) and hypnosis (P<0.001, BF=29.18). Lower:ΔSpO2 across conditions. Changes after the hypnosis session were not significantly different from sham (P=0.36, BF=0.36). **C.** Changes in Borg score.Upper: Borg (scale score) before and after Sham and Hypnosis. Differences between baseline and outcome were significant for sham (P<0.001, BF=24) and hypnosis (P<0.0001, BF=30). Lower:ΔBorg across conditions. Changes after the hypnosis session were not significantly different from sham (P=0.4, BF=0.3).

**Annex S1 – Hypnosis and Sham (active listening) scripts**

Sessions took place in the Pneumonology and Palliative Care wings of the Bligny Hospital Center, Briis-sous-forges, France. All scripts were originally drafted and administered in French. Approximate English translations are provided for clarity by the end of this annex, but these have not been tested for therapeutic validity.

**Préparation et phase de motivation (toute intervention)**

| **Scénario et Introduction 1ère séance**  « Bonjour madame/monsieur,  Mon/Ma collègue et moi nous venons vous voir comme vous le savez déjà dans le cadre de la recherche associée aux soins complémentaires de notre hôpital. Nous allons faire ensemble avec vous quelques petits exercices d'attention pendant une ou deux séances.  Pendant que moi je vous parle et je que vous propose de faire quelques petites tâches, mon/ma collègue vous surveillera. Il s'agit d'une procédure de recherche. D'abord, nous allons prendre quelques notes sur votre état. Maintenant, s'il vous plaît, restez au calme pendant 2 (deux) minutes, avec vos yeux fermés **[mesurer à 2 minutes la Fréquence Respiratoire (FR), la saturation d'oxygène (SpO2)].** Très bien, merci beaucoup. Maintenant nous allons vous demander de remplir un petit tableaux très simple **[donner au patient la STAI-6]**. Très bien ! Merci » | |
| --- | --- |
| **Scénario et Introduction 2ère séance**  « Bonjour madame/monsieur, vous allez bien ? Mon/Ma collègue et moi nous venons encore vous voir pour la recherche liée aux soins complémentaires. Nous allons encore faire un petit exercice, mais différent de celui d'hier ! Mon/ma collègue va aussi nous accompagner.  Comme hier, nous allons prendre quelques notes sur votre état pour vous aider. Maintenant, s'il vous plaît, restez au calme pendant 2 (deux) minutes, avec vos yeux fermés [mesurer à 2 minutes la Fréquence Respiratoire (FR), la saturation d'oxygène (SpO2), donner questionnaires] » | |
| **Séance Attention**  « Concrètement, aujourd'hui nous allons faire un exercice d'attention tout simple. Il s’agit d’une séance « d’écoute active ».  Je vais vous lire un texte qui décrit certains aspects de la vie à la campagne, et exprime quelques opinions. Je vais vous demander de fermer les yeux et rester au calme (sans vous endormir!) et d’écouter attentivement la lecture. Alors, dès que vous entendez une idée avec laquelle vous êtes d'accord, vous allez me l'indiquer en faisant « oui de la tête ». Par exemple, si pendant ma lecture je dis une phrase comme « L’homme est de tous les animaux celui qui peut le moins vivre en troupeaux » et vous trouvez que ça c'est vrai, vous pouvez faire oui de la tête. Alors, pas besoin de faire non de la tête du tout ! Il suffit d'exprimer votre accord, c'est tout !. Cet exercice d’attention et concentration va aussi vous aider à penser à autre chose. N'hésitez pas à bien visualiser les images et vous laisser porter ailleurs. Il se peut que détourner l’attention du milieu hospitalier vous apportera une sensation de bien-être... si cela se produit, n'hésitez pas à en profiter !» | **Séance Hypnose**  [Voir séance d'hypnose pour l'introduction, préalables, etc.] |

**1. Scénario de la séance d’hypnose. (durée équivalente à la séance contrôle). Induction et suggestion hypnotiques destinées aux patients atteints de BPCO**

*par Dr. Hernán Anlló (PhD) 1,2*

1. Watanabe Cognitive Science Lab, Waseda University. School of Fundamental Science and Engineering. Tokyo, Japan.

2. Centre Hospitalier de Bligny, Briis-sous-Forges, France.

(hernan.anllo@cri-paris.org)

**Notice**

Cette séance a été écrite pour être utilisée avec des patients atteints de BPCO. Elle fait partie du projet de développement et d’amélioration des outils cliniques non-médicamenteux du Centre Hospitalier de Bligny. Elle a pour objectif :

**1. de diminuer l’anxiété du patient**

2. d’améliorer immédiatement et durablement la capacité respiratoire du patient.

3. de favoriser le confort et la relaxation du patient.

4. d’améliorer le ressenti général du patient. Meilleur état d'esprit et sensations physiques plus confortables.

[durée maximale estimée 15 minutes]

**Préalables**

-

Pour augmenter l'attente et la perméabilité du patient, il faut dire explicitement :

1. Qu’il s’agit d’un exercice d’hypnose qui a pour but de permettre au corps de s’équilibrer naturellement et d’améliorer la capacité respiratoire, ceci de manière très efficace.

2. Que c’est le patient qui va faire ce travail et qu’il va bien rester conscient de ce qui se passe. Pour encore plus d’efficacité, il va suivre les instructions du praticien parce que celui-ci est là pour l’aider. Lui demander de laisser arriver sans trop réfléchir toutes les sensations et pensées qui peuvent se présenter.

**Induction [voix calme, monotone, ferme]**

[verbatim]

1.«Nous allons donc commencer avec cet exercice d'hypnose. Je vais vous demander de suivre des consignes très simples. Si vous les suivez, et vous êtes certainement motivé et capable de le faire, vous allez ressentir très facilement les bénéfices de l'hypnose, au niveau de votre respiration, au niveau de votre confort et partout en général, car cela peut même avoir des effets positifs inattendus. Des jolies surprises très agréables. Fermez, s'il vous plaît, les yeux... très bien... et comme ça avec les yeux fermés pensez maintenant à la position de votre corps. Prenez un moment pour vraiment prendre conscience de la position de votre corps... de votre tête... de votre... cou... de vos épaules... de votre ceinture abdominale... de vos hanches... de vos jambes...c'est très bien... restez relaxé mais en même temps très

attentif au son de ma voix, concentré sur elle et faites ce que je vais vous proposer de faire, comme vous le faites déjà maintenant... très bien. Laissez votre corps faire le travail et s'occuper de votre respiration et votre respiration va se réguler toute seule, comme quand nous faisons une marche qui nous demande de garder un certain pas, ou que nous montons ou descendons plusieurs marches et que nous avons le temps de faire ça tranquillement... le corps peut tout seul trouver son rythme et ça c'est très bien. Vous n'avez qu'à suivre ma voix et mes instructions et laisser faire, et votre corps va faire ce qu’il a à faire…

2. Maintenant, je vous invite à garder les yeux bien fermés, solidement fermés mais confortables en même temps, comme quand on dort très profondément et agréablement et que nous essayons d'ouvrir les yeux et qu’ils ne répondent pas car ils sont très agréablement fermés, très relaxés... très très bien. Maintenant avec vos yeux toujours fermés regardez vers le haut, comme si vous essayiez de regarder entre vos sourcils... voilà comme ça... essayez

de regarder entre vos sourcils... et c'est tout à fait normal de peut-être ressentir un tout petit peu de tension en haut, au-dessus des yeux... mais ça c'est très bien. Retenez s'il vous plaît cette tension un tout petit peu... c'est un petit effort de concentration, pas physique, et il vaut la peine... très bien... Dans un moment je vais vous demander de la lâcher, de lâcher cette tension et ça va vous apporter une importante relaxation. Dans un moment je vais vous demander de le faire... et vous allez sentir qu'un grand confort s'installe dans votre tête, dans votre poitrine, dans tout votre corps... certains disent que cette sensation ressemble à de l'eau tiède coulant sur le front... très bien... allez-y, relaxez maintenant vos yeux, libérez cette tension de vos yeux... toujours fermés... et relaxez-vous. C'est très bien. Peut-être que maintenant ou dans quelques instants vous allez sentir comme si vos yeux vibraient derrière vos paupières, comme s'ils bougeaient... c'est normal, juste laissez faire et profitez de cette relaxation active, attentive, et écoutez ma voix. Laissez arriver toute sensation qui se présente et profitez-en.»

3. Parfait. Vous avez très bien suivi mes instructions jusqu’à présent. Maintenant, que vous le sentiez ou pas peu importe, l'hypnose travaille déjà, vous travaillez déjà. Dans un petit moment je vais vous demander de faire oui de la tête, lentement, à peine un petit mouvement... et en fait vous allez sentir que tout votre corps se relaxe et que vous avancez vers plus de calme et stabilité. Allez-y, faites oui de la tête maintenant [laisser un moment]... profitez... Très bien. Maintenant, s'il vous plaît, je vous invite à faire attention à toutes les sensations que vous percevez sur votre peau, les draps du lit, ou vos vêtements qui vous caressent peut-être, et de faire mentalement une petite liste de toutes ces sensations... et une fois que vous avez fait cette liste, vous allez me l'indiquer en faisant doucement oui de la tête[laisser un moment]... c'est parfait, c'est très bien. Laissez arriver toutes ces sensations qui arrivent maintenant... Maintenant, je vous propose de faire attention à tous les sons que vous percevez, tous ces petits bruits qui vous entourent, mentalement, vous allez encore faire une petite liste, mentalement... et une fois que vous aurez fait cette liste, cet inventaire sonore, vous allez me l'indiquer en faisant doucement oui de la tête [laisser un moment]... c'est parfait, c'est très bien. Je vous invite, maintenant à faire attention à toutes les odeurs que vous percevez, des petits parfums habituellement ignorés, qui vous entourent, mentalement, comme si c’était une petite liste... et une fois que vous avez fait cette liste, cet inventaire olfactif, vous allez me l'indiquer en faisant doucement oui de la tête [laisser un moment]... c'est parfait, c'est très bien. C'est magnifique, continuez à profiter de cette attention et de cet état.

Vous êtes prêt pour vous relaxer encore plus, et vous stabiliser agréablement encore plus. »

**Suggestion** [voix calme, monotone, ferme, le discours devient progressivement de plus en plus rassurant]

« Prenez un moment pour vous imaginer très loin d'ici. Vous allez toujours bien entendre le son de ma voix, mais imaginez-vous, très loin d'ici, sur une plage très belle, sauvage. Que cette plage existe dans vos souvenirs ou pas peu importe, vous pouvez vous situer sur cette plage. Sentir peut-être le soleil, ou l'air, sur votre peau. Peut-être aussi pouvez-vous sentir le sable sous vos pieds et ça aussi c’est très bien. Ce n'est pas important... Alors, on sait très bien

que l'air de la plage est très pur, car les vagues se brisent en libérant beaucoup, mais vraiment beaucoup d’oxygène... un oxygène pur, accessible, qui rentre presque tout seul dans les poumons. Prenez un moment pour vous situer sur cette plage [laisser un moment] C'est très bien. Profitez... [laisser un moment]. Je veux que vous fassiez dans un moment cinq pas vers la mer, et à chaque pas, vous allez faire oui de la tête pour me l’indiquer... dans un moment,

vous allez faire cinq pas vers la mer, et à chaque pas, vous allez faire oui de la tête pour me l’indiquer... Quelque chose de très intéressant va se passer... À chaque pas que vous allez faire vers la mer, vous allez profiter encore plus de cette ambiance magnifique et de cette brise de mer. Allez-y, on y va ! Et à chaque pas, vous allez faire oui de la tête pour me

l’indiquer... [si besoin, c'est possible de diriger le patient dans sa marche : «Un pas... très bien... deux pas...]. Excellent. Profitez... »

**Finalisation**

« Continuez à profiter de ce calme et de cette stabilité autant que vous le désirez. Quand vous serez prêt, et vous prenez tout le temps dont vous avez besoin pour cela, vous allez vous étirer doucement, vous allez garder ce confort avec vous, et vous allez ouvrir doucement vos yeux. Ce calme va vous accompagner autant que vous le souhaitez. Très bien, allez-y. Très bien. Vous êtes maintenant prêt pour continuer votre journée. Et ce calme, cette plage, cette brise, restent complètement à votre disposition... il suffira de fermer vos yeux et d'y revenir, et votre corps va de lui-même s’équilibrer. Parfait, c'est très bien. Vous avez bien travaillé. »

**2. Article type pour l’exercice d’attention (durée équivalente à la séance d’hypnose).**

**Une histoire du retour à la terre**

Laisser derrière soi les villes crasseuses et bourdonnantes, fuir les intrigues et l’agitation citadines, partir à la campagne, se reconnecter avec la nature et avec soi-même. Cette tentation si largement partagée aujourd’hui est-elle un syndrome contemporain ou un appel de tous les temps ?

On imagine souvent que les désirs de campagne sont le fruit d’une histoire récente, celle des années 70 et des mouvements hippies et contestataires en réaction à une industrialisation déshumanisante et à un matérialisme décrié. Mais l’histoire du retour à la terre est en réalité une vieille rengaine, aussi ancienne que l’histoire des villes et de l’agriculture. Portée aussi bien par des courants progressistes que conservateurs, religieux ou matérialistes, elle a touché tous les milieux sociaux dans presque tous les pays occidentaux. Plongeons-nous un moment dans une petite histoire du retour à la terre.

"Les hommes ne sont point faits pour être entassés en fourmilières, mais épars sur la terre qu’ils doivent cultiver.” J-J Rousseau

**Villes/campagnes, je t’aime, moi non plus**

On ne peut pas comprendre les aspirations rurales à travers les âges sans rentrer dans les rapports ambigus entre les villes et les campagnes. Ce qu’on reproche aux villes aujourd’hui n’est pas nouveau. [laisser un moment] La ville symbolise de tout temps le pouvoir, le vice et la corruption. Avant Paris, c’était Rome, avant Rome, Babylone ou encore Sodome et Gomorrhe que Dieu raya de la surface du globe pour excès de vice. Tout simplement ...

En 1762, Jean-Jacques Rousseau non plus n’y allait pas de main morte. « Les hommes ne sont point faits pour être entassés en fourmilières, mais épars sur la terre qu’ils doivent cultiver, écrivait-il dans son ouvrage Émile ou De l’éducation. Plus ils se rassemblent, plus ils se corrompent. Les infirmités du corps, ainsi que les vices de l’âme, sont l’infaillible effet de ce concours trop nombreux. L’homme est de tous les animaux celui qui peut le moins vivre en

troupeaux. »

**Loin des hommes, près de Dieu**

Dans l’ancien temps, quand les sociétés étaient largement religieuses, les villes étaient perçues comme les royaumes des hommes, lieux artificiels et artificieux où le pouvoir temporel s’exposait sans honte et sans pudeur à la surface du monde. [laisser un moment]La campagne, à l’inverse, était restée plus proche de l’ordre naturel, c’est-à-dire de l’ordre

divin. Les choses et les gens étaient supposés être plus proches de leur Créateur, vivant en meilleure harmonie avec le projet du Tout-Puissant. Un exemple caractéristique se déroule en 1085 avec la fondation de l’ordre des Chartreux.

Écuré par les intrigues du Haut clergé, Bruno décide de quitter Reims où lui était promis un poste d’archevêque, pour mener une vie quasi érémitique dans le massif de la Chartreuse puis en Calabre, fondant au passage l’ordre des Chartreux, l’un des plus radicaux dans son opposition à l’ordre social de son temps.

A travers tout le Moyen Âge, les monastères servent de lieux de ralliement pour ceux qui souhaitent quitter le monde et mener une vie plus proche de leur idéal. Mais bientôt, l’Europe est secouée par le séisme de la Réforme et s’embrase comme une torche. Catholiques et protestants s’écharpent alors que naissent un peu partout des mouvements religieux minoritaires. Parmi ces courants, les anabaptistes refusent toute forme d’autorité, qu’elle vienne du droit laïc ou d’un quelconque clergé. Persécutés sur le vieux continent, ils ne tarderont pas à rejoindre le nouveau monde où ils pourront construire une société qui ressemble à leur conception religieuse ; une vie rurale évidemment. Les

anabaptistes existent encore, on les appelle aujourd’hui les amish et leur première règle est «tu ne te conformeras point à ce monde qui t’entoure » ! Le nouveau monde américain agit comme un gigantesque appel d’air. La terre y est vaste et fertile, l’emprise des villes et du pouvoir y est faible. Dans ces promesses s’engouffrent aussi bien les voracités prédatrices que les idéaux les plus élevés.

Et quand les idéaux commencent à sortir de la tutelle religieuse, une pensée laïque mais non moins mystique sur la nature reprend le flambeau. Dans les années 1850, Henry David Thoreau sera l’un des pionniers du retour à la terre et de la simplicité volontaire. Pendant 2 ans et 2 mois, il mènera une expérience de vie autonome, dans une cabane isolée au fond d’une forêt du Massachusetts. Refusant de payer des impôts pour protester contre la politique du gouvernement américain, il inventera également le concept de désobéissance civile qui restera toujours lié à la vie autonome et rurale. [laisser un moment]

**Cité d’échange, cité productive**

Avant la révolution industrielle, la conception dominante était que seules la terre et l’agriculture étaient créatrices de richesses, le commerce n’étant qu’un simple déplacement de valeurs, une opération à somme nulle. Cette idée développée par les physiocrates est alors très largement partagée. Ainsi, la campagne est la source principale de la valeur tandis que les villes sont avant tout des lieux d’échange, de pouvoir et de transmission.

Mais rapidement, les hommes commencent à se rassembler en masse autour des outils, des

mines et des usines. La cité devient productive, l’industrie prend le pas sur l’agriculture. Les paysans quittent la terre par millions.Pour la première fois, les campagnes se retrouvent en concurrence avec les villes sur le plan économique. Ce choc provoque évidemment des réactions et, d’abord, une certaine nostalgie d’un ordre en déclin. Le courant romantique se nourrit largement de ce sentiment et renouvelle l’imaginaire de la nature comme lieu d’harmonie où l’on peut mieux exprimer sa sensibilité profonde, loin des cités superficielles, sales et laborieuses. Plus tard, l’impressionnisme reprendra le flambeau et les résidences d’artistes fleuriront dans la forêt de Fontainebleau et sur les rives préservées de la Seine.

Sur le plan politique, on assiste pour la première fois à des tentatives d’union et de défense du monde agricole. L’agrarisme fait son apparition. Ce courant, aujourd’hui peu connu, est à la fois un mouvement social et une école de pensée qui considère l’agriculture comme ne pouvant être totalement incluse dans l’économie de marché. Il aura une influence majeure en Europe entre la fin du XIXe siècle et jusqu’à la seconde guerre mondiale. Organisant la vie rurale, défendant les intérêts et le mode de vie paysans, il tente également de promouvoir les initiatives de retour à la terre. On doit à ce courant la création du ministère de l’Agriculture (1881) et des caisses agricoles.

**Quand la campagne ne gagne plus**

Après la seconde guerre mondiale, la question du retour à la terre connaît un certain déclin. La reconstruction occupe les esprits, le progrès technique et l’impressionnante croissance économique des Trente Glorieuses fait passer les aspirations rurales pour de la sensiblerie d’un autre âge. À cela, il faut bien ajouter que l’exaltation des « valeurs rurales » a tenu un rôle important dans la propagande de Pétain... Les images d’Épinal de la vie à la campagne ont logiquement pris un sérieux coup sur la patate.

C’est dans les années 70 que l’idée du retour à la terre refait surface, sous une forme très différente. Le matérialisme est en crise et la société n’offre pas d’horizons satisfaisants pour les jeunes générations. Ce courant est à la fois politique, spirituel et non matérialiste. Il introduit pour la première fois une sensibilité écologique. Les initiatives des années 70 connaîtront des fortunes diverses mais l’expérience a durablement marqué les esprits.

Aujourd’hui, l’aventure rurale n’est pas terminée, elle est même en pleine renaissance. Depuis le début des années 90, les campagnes ont une dynamique démographique positive ; une première depuis un siècle. En ces temps de crise économique, écologique, voire alimentaire, ceux qu’on appelle désormais les néoruraux s’établissent à nouveau dans les campagnes. Avec l’essor des technologies numériques et la capacité inédite à travailler à distance, il est désormais de plus en plus envisageable de combiner une vie rurale proche de la nature avec un travail connecté suffisamment rémunérateur. Allons-nous assister à un exode urbain numérique ? L’histoire continue …

[ENGLISH TRANSLATION]

**Preparation and motivation stage (for both interventions)**

| **Introductory script to the first session**  « Hello sir/madam,  My colleague and I have come to see you, as you very well know, because of the research program in complementary therapies currently taking place at our hospital. We shall work together with you for one or maybe two sessions, and guide you through some easy, short attention exercices.  While I talk to you and ask you to follow some easy instructions and do some mental tasks, my colleague will keep an eye on you, maybe even approach you or touch you, and take some notes. This is a research procedure. First, we’ll take some notes on your current state. Now please, kindly stay calm and relax for 2 (two) minutes, with your eyes closed **[count 2 minutes, and then immediately measure Respiratory Rate (RR) and Oxygen Saturation (SpO2)].** That’s great ! Thank you so much. Now I’m going to ask you to fill this small questionnaire **[give the STAI-6 questionnaire to the patient]**. Thank you ! Perfect ! » | |
| --- | --- |
| **Introductory script to the second session**  « Hello sir/madam, how are you doing today ? My colleague and I have come to see you once again because of the research program in complementary therapies. We are going to do one more small exercice, but this time we are going to do something a little diffent ! My colleague shall be with us like last time.  Just like yesterday, we’ll be making some observations regarding your current state before we begin. Now please, kindly stay calm and relax for 2 (two) minutes, with your eyes closed **[count 2 minutes, and then immediately measure Respiratory Rate (RR) and Oxygen Saturation (SpO2)].** That’s great ! Thank you so much. Now I’m going to ask you to fill this small questionnaire **[give the STAI-6 questionnaire to the patient]**. Thank you ! Perfect ! » | |
| **Active Listening Session**  « In short, today we are going to do a very simple attentional exercice. It’s called an « active listening » exercice. I am going to read you a text that describes certain aspects of life in the countryside, and presents certain points of view. I will ask you to close your eyes and relax (without falling asleep!), and pay great attention to the text. Now, if you listen to an opinion that you agree on, you are going to let me know by nodding « yes ». For example, if during my reading I say a phrase such as « Of all animals, man is the one which has the hardest time living in a pack »and you find this to be the case, you have to nodd in agreement. No need to shake your head for saying « no », though! Just nodd for agreement, that’s it. This exercice of attention and concentration will help you to place your mind elsewhere. Please don’t refrain from visualizing every image, and just let yourself go as far as you may go. It might just be that taking your mind away from the hospital and so on may bring you a calming sensation of welness... if that happens, just go along with it and enjoy !» | **Hypnosis Session**  [See the hypnosis script for intro, etc.] |

**1. Hypnosis script. (same duration as the Active Listening session). Hypnotic induction and suggestion for COPD patients**

*by Dr. Hernán Anlló (PhD) 1,2*

1. Watanabe Cognitive Science Lab, Waseda University. School of Fundamental Science and Engineering. Tokyo, Japan.

2. Centre Hospitalier de Bligny, Briis-sous-Forges, France.

(hernan.anllo@cri-paris.org)

**Disclaimer**

This hypnosis session has been developped to target specifically COPD patients. It belongs to a research project aiming to improve non-drug complementary tools daily used at the Bligny Hospital Center. Its main goals are :

**1. Reducing the patient’s anxiety.**

2. Improving the respiratory efficacy in an immediate fashion.

3. Inducing a state of comfort and relaxation.

4. Improving the patient’s state of mind and making her feel pleasant physical sensations that may be uncommon to her due to the COPD condition.

[max duration 15 minutes]

**Foreword**

-

In order to improve the patient’s permeability to suggestion, the reader must explicitly state :

1. That this is a hypnosis exercice that has the goal of allowing the body to reach a natural balance and improve respiratory capacity in a very effective way.

2. That by listening and following the instructions, the patient herself will be doing all the work, and remain conscious of everything that happens. The practitionner is there to guide her and help her do the work in such a way that she achieves the best possible outcome. Tell her to let herself go without giving much thought to whatever sensation or thought might arrive during the exercice.

**Induction [calm, firm, monotonic]**

[verbatim]

1.«So let's start with this hypnosis exercise. I will ask you to follow very simple instructions. If you follow them, and you are certainly motivated and able to do so, you will very easily feel the benefits of hypnosis in terms of your breathing, your comfort and everything else in general, as it may even have unexpected positive effects. Nice, pleasant surprises…. Please, close your eyes now ... very well ... and like that, while your eyes remain closed, think now about the position of your body. Take a moment to really realize the position of your body ... of your head ... of your neck ... your shoulders ... your waist ... your hips ... of your legs ... yes, very good ... stay relaxed, but at the same time very attentive to the sound of my voice... Concentrate on it and do what I am going to propose to you, as you are already doing now ... very well. Let your body do the work and take care of your breathing... and your breathing will regulate itself, such as when we go for a strole that demands that we keep a certain step, or we go up or down several stairs, but we have the time to do it quietly ... the body can find its own rhythm and that's fine. You just have to follow my voice and my instructions and let go, and your body will do what it has to do ... »

2. « Now, I invite you to keep your eyes closed, firmly closed but comfortable at the same time, as when you sleep very deeply and pleasantly, and that you try to open our eyes and they do not respond because they are very pleasantly closed , very relaxed ... very very good. Now with your eyes still closed look up, as if you were trying to look between your eyebrows ... just like that ... try to look between your eyebrows ... and it's perfectly normal to maybe feel a little bit of tension above, above the eyes ... but that's fine. Please keep this tension a little bit ... it's a small effort of concentration, not a physical effort, and it's well worth doing it... very well ... In a moment I'll ask you to let go, to release this tension and it will bring you an important feeling relaxation. In a moment I will ask you to do it ... and you will feel that a great comfort settles in your head, in your chest, in all of your body ... some say that this feeling resembles to warm water flowing on the forehead ... very good ... go ahead, relax your eyes now, release this tension from your eyes ... always closed ... and relax. Very good. Maybe now or in a few moments you will feel as if your eyes were vibrating behind your eyelids, as if they were moving ... this is normal, just let go and enjoy this active, attentive relaxation, and listen to my voice. Just allow yourself to feel any sensation that may comes about, and enjoy.»

3. « Perfect. You have followed my instructions very well so far. Now, whether you feel it or not, it does not matter, hypnosis is already working, you are already working. In a little while I will ask you to nod as to say yes, slowly, just a little movement ... and in fact you will feel that as you nod your whole body relaxes and you move towards more calmness and stability. Go ahead, nod yes now [leave a moment] ... enjoy that feeling... Alright. Now, please, I invite you to pay attention to all the sensations that you perceive on your skin, the sheets of the bed, or your clothes which you may be feeling against your skin right now, and to make a mental list of all these sensations ... and once you've made this list, you'll let me know by gently nodding [leave a moment] ... That’s perfect, great actually. Let all these sensations happen that happen now ... Now, I suggest you pay attention to all the sounds you hear, all these little noises around you... mentally, you will once again make a list, mentally ... and once you've made this list, this sound inventory, you'll let me know by gently nodding [leave a moment] ... great, very good. I invite you now to pay attention to all the smells that you perceive, small perfumes, scents usually ignored, which surround you... mentally make a small list ... and once you have made this list, this olfactory inventory, you'll let me know by gently nodding [leave a moment] ... very good. Great, now continue to enjoy this attention and this state.

You are ready to relax even more, and stabilize yourself even more.»

**Suggestion** [calm, firm, monotonic, more and more reassuring]

« Take a moment to imagine yourself far away from here. You will always hear the sound of my voice, but imagine yourself far away from here, on a very beautiful, wild beach. You find it beautiful and you feel very much at ease on this beach. Whether this beach exists in your memories or not, it does not matter, you can still locate yourself on this beach. Maybe you feel the sun, or the air, on your skin. Maybe you can feel the sand under your feet and that's fine too. It doesn’t matter really ... So, we know very well that the air on the beach is very pure, because the waves break, releasing a lot, a whole big lot, of oxygen ... a pure oxygen that’s accessible, that enters the lungs almost on its own. Take a moment to situate yourself on this beach [leave a moment] That's fine. Enjoy ... [leave a moment]. I want you to make five steps towards the sea in a moment. This sea, the sight of this sea, makes you very happy and calm... and at every step, you will nod to tell me that you have taken the step ... in a moment,
you will take five steps in the direction of the sea, and at every step, you will get closer to all of this magnificent oxygen ... And something very interesting will happen ... At every step you take towards the sea youenjoy this beautiful atmosphere and sea breeze even more. Go on, let's go! And at every step, you will nod ... [if necessary, it is possible to direct the patient and guide her walk: "One step ... very well ... two steps ...]. Excellent. Enjoy ... »

**Ending**

"Keep enjoying this calm and stability as much as you want. When you are ready, and you can take all the time you need, you will stretch gently, and you will keep this comfort with you. You will gently open your eyes. This calm will accompany you as much as you want it to. All right, go ahead. Very good. You are now ready to continue with your day. And this calmness, this beach, this breeze, they remain completely at your disposal ... it will suffice to close your eyes and come back to this place, to this state, and your body will balance itself. Perfect, very good. You worked very well. "

**2. Opinion piece for the Active listening session (same duration as the hypnosis session).**

**A history of returning to the land**

Leaving behind the grimy and buzzing cities, fleeing urban intrigue and agitation, going to the countryside. Reconnecting with nature and with yourself. Is this temptation so widely shared today a contemporary syndrome or a call of the times?

It is often imagined that this crave for the countryside is the fruit of recent history, that of the 70s’, with its hippie and protest movements reacting to dehumanizing industrialization and decried materialism. But the story of the return to the land is actually an old story, as old as the history of cities and agriculture. Upheld as much by progressive currents as by conservatives, religious or materialistic movements, it has affected all social circles in almost all Western countries. Let's dive a moment into a little story of returning to the land.

"Men are not made to be piled in anthills, but scattered on the land they must cultivate." J-J Rousseau

**Cities / countryside, I love you, me neither**

We can not understand rural aspirations through the ages without getting into the ambiguous relationship between cities and the countryside. What is being blamed on cities today is not new. [leave a moment] The city has always symbolized power, vice and corruption. Before Paris, it was Rome, before Rome, Babylon or Sodom and Gomorrah that God scratched from the surface of the globe for excess of vice. Just like that.

In 1762, Jean-Jacques Rousseau was not kind to cities either. "Men are not made to be crammed into anthills, but scattered over the land they must cultivate," he wrote in his book « Émile, ou De l'éducation ». The more they gather, the more they corrupt themselves. The infirmities of the body, as well as the vices of the soul, are the infallible effect of this forced contest. Of all animals, man is the one which has the hardest time living in a pack.

**Far from men, near to God**

In the old days, when societies were largely religious, cities were perceived as the kingdoms of mankind, artificial and artificious places where the ephimerous power of man was exposed without shame on the surface of the world. [let a moment] The countryside, conversely, remained closer to the natural order, that is to say of the order of the divine. Things and people were supposed to be closer to their Creator, living in harmony with the project of the Almighty. A typical example of this takes place in 1085, with the founding of the Carthusian order.

Frightened by the intrigues of the High Clergy, Bruno decided to leave Reims where he was promised an archbishop position, to lead an almost eremitical life in the Chartreuse, and then in Calabria, founding as he passed by the order of the Carthusians, one of the most radical in its opposition to the social order of its time.

Throughout the Middle Ages, monasteries served as rallying places for those wishing to leave the world and lead a life closer to their ideal. But soon, Europe was shaken by the earthquake of the Reformation, blazing like a torch. Catholics and Protestants fled, while minority religious movements sprouted up everywhere. Among these currents, the Anabaptists refused any form of authority, whether it came from secular law or from any clergy. Persecuted on the old continent, they were to soon join the new world, where they could build a society that resembled their religious conception of a rural life.

The anabaptists still exist, they are now called Amish, and their first rule is "you will not conform to this world around you". The new American world embodied their gigantic call for air. The land was vast and fertile, the influence of cities and power was weak.

And when ideals began to come out of religious tutelage, a secular but no less mystical thought about nature picked up the torch. In the 1850s, Henry David Thoreau was one of the pioneer advocates of the return to the land movement for a voluntary simplicity. For 2 years and 2 months, he lead living experience of isolation in a secluded cabin at the bottom of a Massachusetts forest. Refusing to pay taxes to protest the US government's policy, he also invented the concept of civil disobedience, that would forever be tied to autonomous and rural life. [leave a moment]

**City of exchange, city of productivity**

Before the industrial revolution, the dominant conception was that only land and agriculture were creators of wealth. Trade was a mere displacement of values, a zero-sum operation. This idea was developed by the physiocrats, and it spread like fire. The countryside was seen as the main source of value, while cities were above all places of exchange, power and transmission.

But soon after, men started to gather en masse around workshops, mines and factories. The city became productive, industry took precedence over agriculture. Farmers left the land by the millions. For the first time, the countryside found itself in competition with the cities on an economic level. This shock obviously caused some reactions, the first and most important one being a certain nostalgia for the declining order. The romantic current fed largely on this feeling, and renewed the imagination of nature as a place of harmony, where one can better express one's profound sensibility, far from superficial, dirty, laborious cities. Later, Impressionism took over the torch and artists' residences flourished in the forest of Fontainebleau, and on the preserved banks of the Seine.

On the political front, those times witnessed the very first attempts to unite and defend the agricultural world. Agrarism started to emerge. That current, little known today, was both a social movement and a school of thought, which considered agriculture as partially excluded from market economy. It had a major influence in Europe between the end of the 19th century and the Second World War. It organized rural life, defended the peasants' interests and way of life, and tried to promote initiatives of return to the land. It played a major rôle in the creation of the Ministry of Agriculture (1881) and the first agricultural funds.

**When the countryside stopped winning**
After the Second World War, the ideal of returning to the land knew a certain decline. All minds, technical progress and the impressive economic growth of the Glorious 30’s revolved around rebuilding the cities, turning the rural aspirations for sentimentality into a thing of the past. On top of this, the exaltation of "rural values" had actually played a key role in Petain's propaganda ... the end of his time and the burning social desire of leaving the past behind meant a serious blow to the country life imaginary.
But by the 1970s, the idea of returning to the land resurfaced in a very different form. Materialism was in crisis, and society did not offer satisfactory horizons for the younger generations. The countryside advocacy movement became at once political, spiritual and non-materialistic. It introduced for the first time the concept of ecological sensitivity. While the initiatives launched during the 70s had variable outcomes, the experience as a whole left a lasting mark.
Today, the rural adventure is far from over, and one may even say it is in full rebirth. Since the early 1990s, the countryside has experienced a positive demographic dynamic; for the first time in over a century. In these times of economic, ecological and even food crises, those who are now called “neo-rurals” are starting to set in the countryside once again. With the rise of digital technologies and the unprecedented ability to work remotely, it is now increasingly possible to combine a rural life close to nature with a sufficiently profitable digital line of work. Are we going to witness a digital urban exodus? Only time will tell …

**CONSORT 2010 checklist of information to include when reporting a randomised trial***
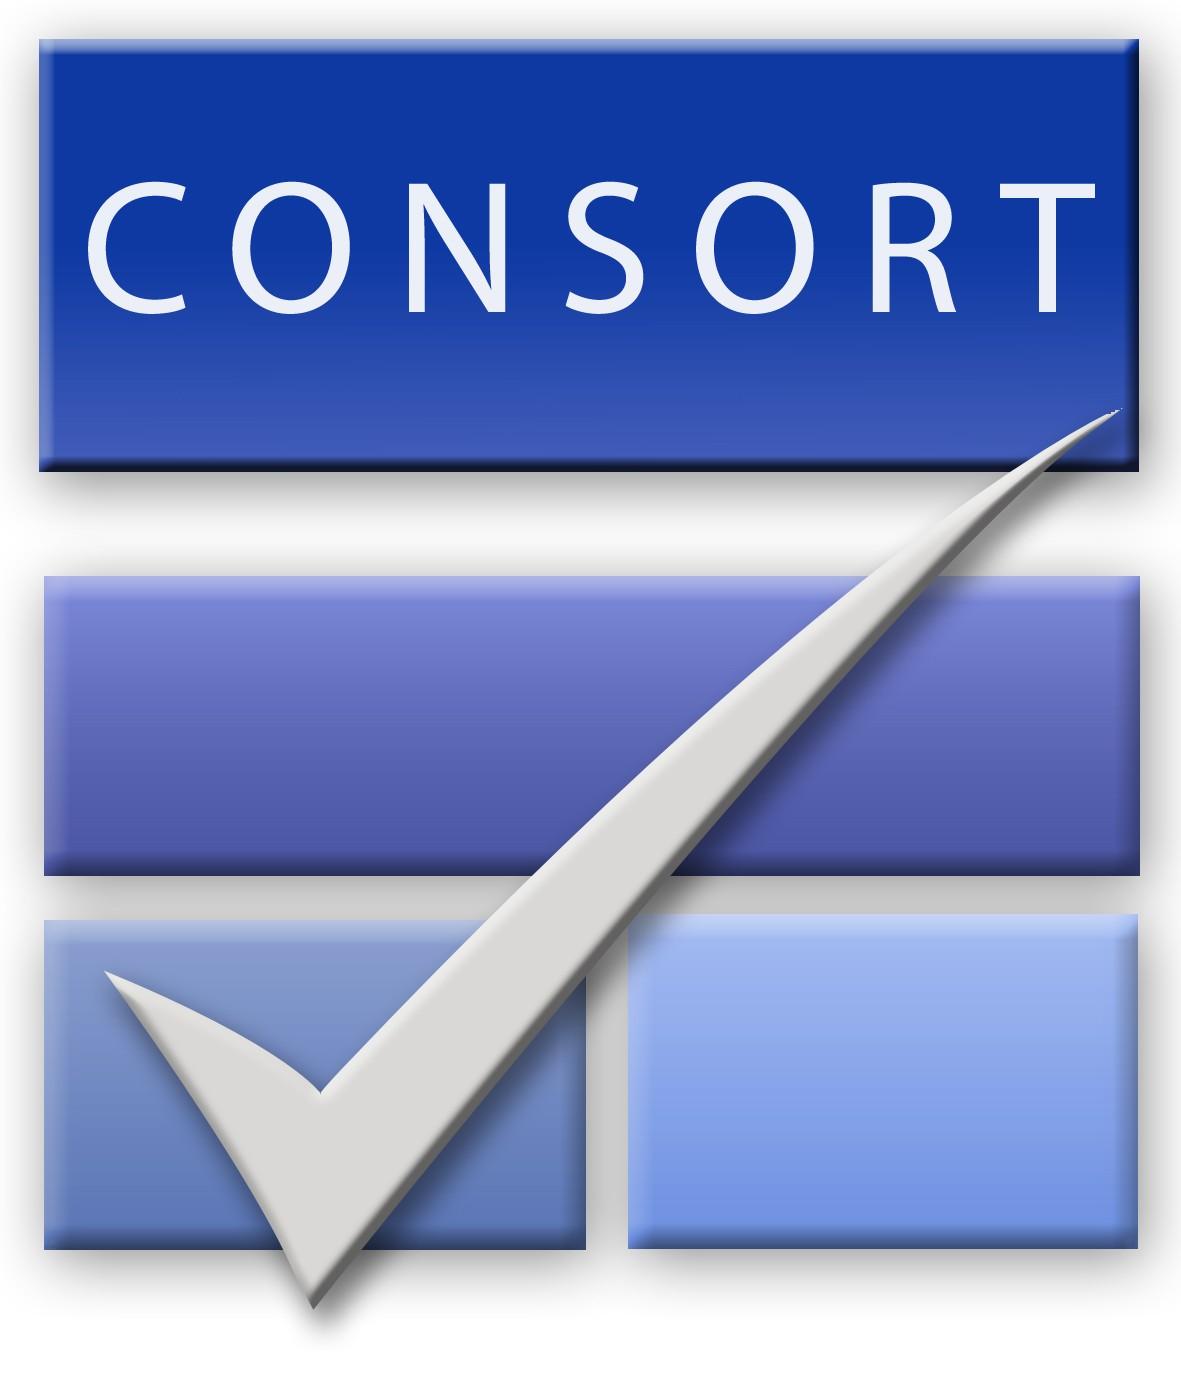


| **Section/Topic** | **Item No** | **Checklist item** | **Reported on page No** |
| --- | --- | --- | --- |
| **Title and abstract** | | | |
|  | 1a | Identification as a randomised trial in the title | p. 1 |
| 1b | Structured summary of trial design, methods, results, and conclusions (for specific guidance see CONSORT for abstracts) | p. 2 |
| **Introduction** | | | |
| Background and objectives | 2a | Scientific background and explanation of rationale | p. 3 |
| 2b | Specific objectives or hypotheses | pp.3-4 |
| **Methods** | | | |
| Trial design | 3a | Description of trial design (such as parallel, factorial) including allocation ratio | p.4 |
| 3b | Important changes to methods after trial commencement (such as eligibility criteria), with reasons | NA |
| Participants | 4a | Eligibility criteria for participants | p. 5 |
| 4b | Settings and locations where the data were collected | p. 4 |
| Interventions | 5 | The interventions for each group with sufficient details to allow replication, including how and when they were actually administered | pp.4, 5, 6 |
| Outcomes | 6a | Completely defined pre-specified primary and secondary outcome measures, including how and when they were assessed | p. 6 |
| 6b | Any changes to trial outcomes after the trial commenced, with reasons | NA |
| Sample size | 7a | How sample size was determined | pp.7,8 |
| 7b | When applicable, explanation of any interim analyses and stopping guidelines | NA |
| Randomisation: |  |  |  |
| Sequence generation | 8a | Method used to generate the random allocation sequence | p.4 |
| 8b | Type of randomisation; details of any restriction (such as blocking and block size) | p.4 |
| Allocation concealment mechanism | 9 | Mechanism used to implement the random allocation sequence (such as sequentially numbered containers), describing any steps taken to conceal the sequence until interventions were assigned | pp.4,5 |
| Implementation | 10 | Who generated the random allocation sequence, who enrolled participants, and who assigned participants to interventions | pp.4,5 |
| Blinding | 11a | If done, who was blinded after assignment to interventions (for example, participants, care providers, those assessing outcomes) and how | pp.4,5 |
| 11b | If relevant, description of the similarity of interventions | pp.4,5 |
| Statistical methods | 12a | Statistical methods used to compare groups for primary and secondary outcomes | pp.7,8 |
| 12b | Methods for additional analyses, such as subgroup analyses and adjusted analyses | pp.7,8 |
| **Results** | | | |
| Participant flow (a diagram is strongly recommended) | 13a | For each group, the numbers of participants who were randomly assigned, received intended treatment, and were analysed for the primary outcome | p. 8 |
| 13b | For each group, losses and exclusions after randomisation, together with reasons | p. 8 |
| Recruitment | 14a | Dates defining the periods of recruitment and follow-up | p. 4, 5 |
| 14b | Why the trial ended or was stopped | p. 5 |
| Baseline data | 15 | A table showing baseline demographic and clinical characteristics for each group | p.8 |
| Numbers analysed | 16 | For each group, number of participants (denominator) included in each analysis and whether the analysis was by original assigned groups | pp.8,9,10 |
| Outcomes and estimation | 17a | For each primary and secondary outcome, results for each group, and the estimated effect size and its precision (such as 95% confidence interval) | pp.8,9,10 |
| 17b | For binary outcomes, presentation of both absolute and relative effect sizes is recommended | NA |
| Ancillary analyses | 18 | Results of any other analyses performed, including subgroup analyses and adjusted analyses, distinguishing pre-specified from exploratory | pp.8,9,10 |
| Harms | 19 | All important harms or unintended effects in each group (for specific guidance see CONSORT for harms) | pp.11,12 |
| **Discussion** | | | |
| Limitations | 20 | Trial limitations, addressing sources of potential bias, imprecision, and, if relevant, multiplicity of analyses | pp.11,12 |
| Generalisability | 21 | Generalisability (external validity, applicability) of the trial findings | pp.10,11,12 |
| Interpretation | 22 | Interpretation consistent with results, balancing benefits and harms, and considering other relevant evidence | pp.10,11 |
| **Other information** | | |  |
| Registration | 23 | Registration number and name of trial registry | p.1 |
| Protocol | 24 | Where the full trial protocol can be accessed, if available | p.1 |
| Funding | 25 | Sources of funding and other support (such as supply of drugs), role of funders | p.13 |

*We strongly recommend reading this statement in conjunction with the CONSORT 2010 Explanation and Elaboration for important clarifications on all the items. If relevant, we also recommend reading CONSORT extensions for cluster randomised trials, non-inferiority and equivalence trials, non-pharmacological treatments, herbal interventions, and pragmatic trials. Additional extensions are forthcoming: for those and for up to date references relevant to this checklist, see [www.consort-statement.org](http://www.consort-statement.org/).

**Note:** Reproduced from Schulz KF, Altman DG, Moher D, for the CONSORT Group (2010) CONSORT 2010 Statement: Updated Guidelines for Reporting Parallel Group Randomised Trials. PLoS Med 7(3): e1000251. Creative Commons license and disclaimer available from: http://creativecommons.org/licenses/by/4.0/legalcode.
